# Supplementary material
Source: PubMed Central journal article supplement (PMC2633083)
Supplement: emboj2008259s1.pdf [file emboj2008259s1.pdf]

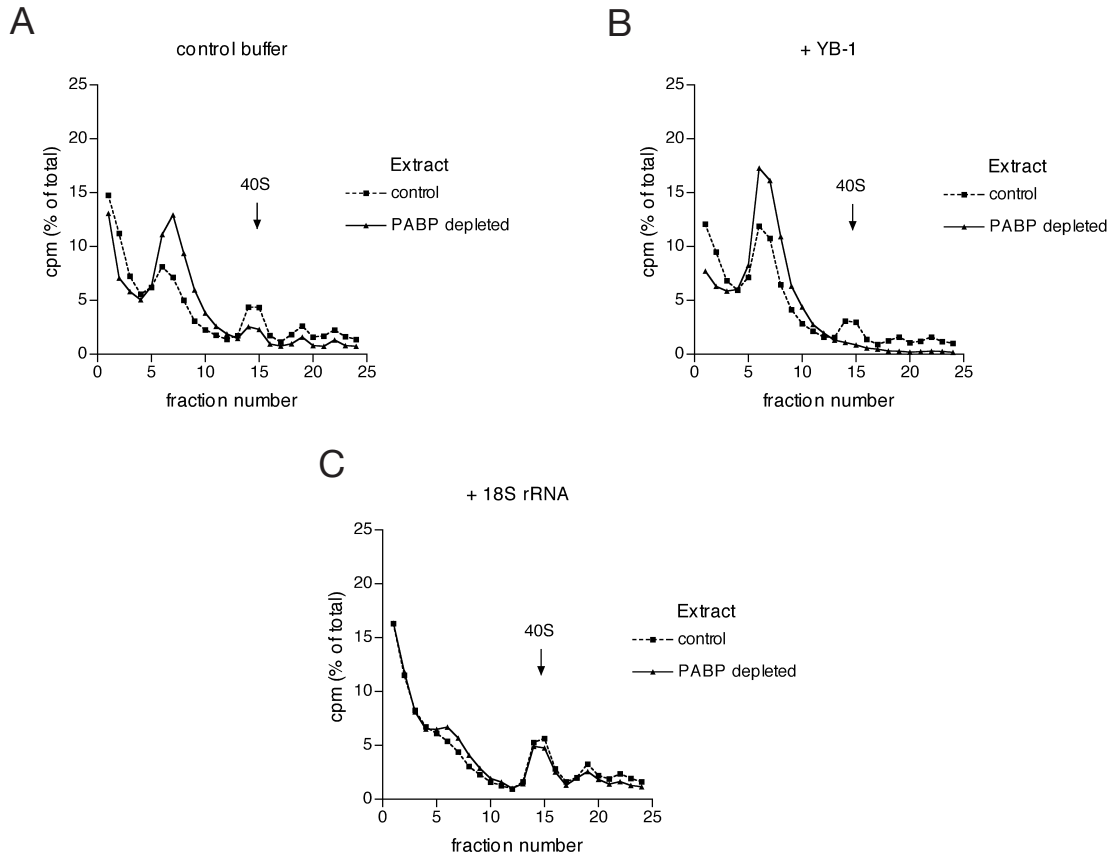

**Figure S1** PABP dependency of 40S ribosomal subunit binding in Krebs-2 cell extracts as affected by YB-1 and 18S rRNA. 40S ribosome binding to  $^{32}\text{P}$ -labeled globin mRNA was assayed in the presence of GMPPNP as described in Materials and methods. 48S ribosome initiation complex profiles of control (squares, dashed line) and PABP-depleted (triangles, solid line) Krebs-2 cell extracts supplemented with control buffer (A), YB-1 (20  $\mu\text{g}/\text{ml}$ ) (B) or 18S rRNA (50  $\mu\text{g}/\text{ml}$ ) (C) are shown. The positions of the 40S ribosomal subunit marker are indicated. Relative efficiencies of 40S ribosome binding in PABP-deleted vs. control extract were  $\sim 50\%$ ,  $80\%$ , and  $10\%$  for panels A, B, and C, respectively. (On panel B, the reduction of 48S initiation complex formation by PABP depletion could be underestimated due to poor resolution of 48S and mRNP complexes) Similar results were obtained in another experiment.
